# Supplementary material for: The impact of angiogenesis inhibitors on survival of patients with small cell lung cancer
Source: PubMed Central journal article supplement (PMC6792507; doi:10.1002/cam4.2462), 2019-08-21
Supplement: CAM4-8-5930-s001.pdf [file CAM4-8-5930-s001.pdf]

**A**

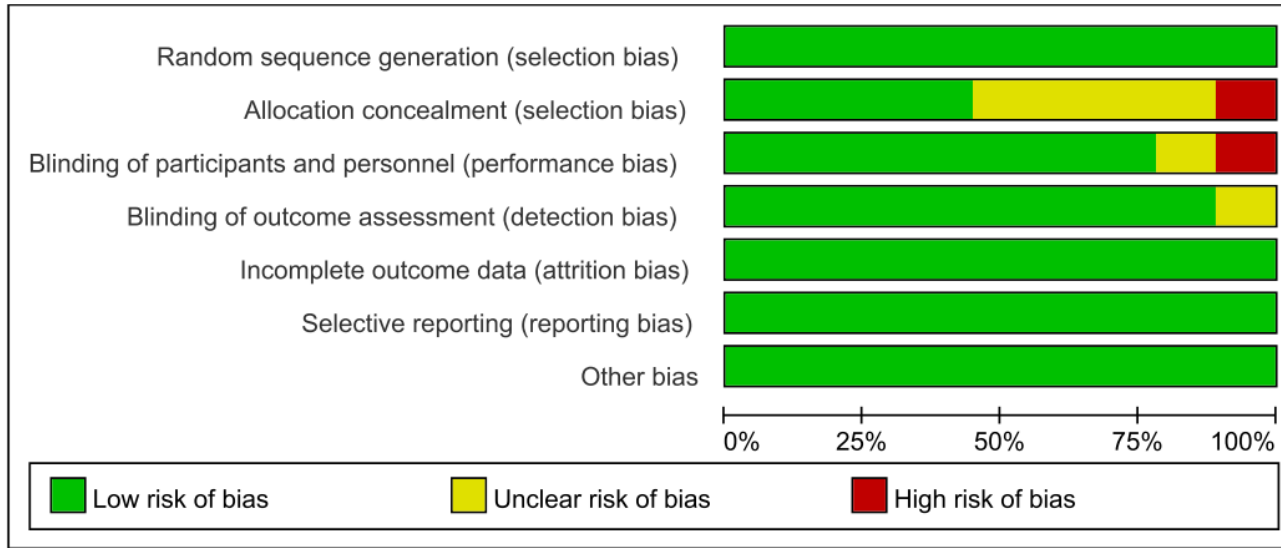

**B**

| Study          | Random sequence generation (selection bias) | Allocation concealment (selection bias) | Blinding of participants and personnel (performance bias) | Blinding of outcome assessment (detection bias) | Incomplete outcome data (attrition bias) | Selective reporting (reporting bias) | Other bias |
|----------------|---------------------------------------------|-----------------------------------------|-----------------------------------------------------------|-------------------------------------------------|------------------------------------------|--------------------------------------|------------|
| Arnold AM2007  | +                                           | +                                       | +                                                         | +                                               | +                                        | +                                    | +          |
| Lee SM2009     | +                                           | +                                       | +                                                         | +                                               | +                                        | +                                    | +          |
| Lu S2015       | +                                           | -                                       | -                                                         | +                                               | +                                        | +                                    | +          |
| Pujol JL2007   | +                                           | ?                                       | +                                                         | +                                               | +                                        | +                                    | +          |
| Pujol JL2015   | +                                           | ?                                       | ?                                                         | ?                                               | +                                        | +                                    | +          |
| Ready NE2016   | +                                           | ?                                       | +                                                         | +                                               | +                                        | +                                    | +          |
| Sanborn RE2017 | +                                           | +                                       | +                                                         | +                                               | +                                        | +                                    | +          |
| Spigel DR2011  | +                                           | ?                                       | +                                                         | +                                               | +                                        | +                                    | +          |
| Tiseo M 2017   | +                                           | +                                       | +                                                         | +                                               | +                                        | +                                    | +          |
