# Supplementary material for: The impact of angiogenesis inhibitors on survival of patients with small cell lung cancer
Source: PubMed Central journal article supplement (PMC6792507; doi:10.1002/cam4.2462), 2019-08-21

**A**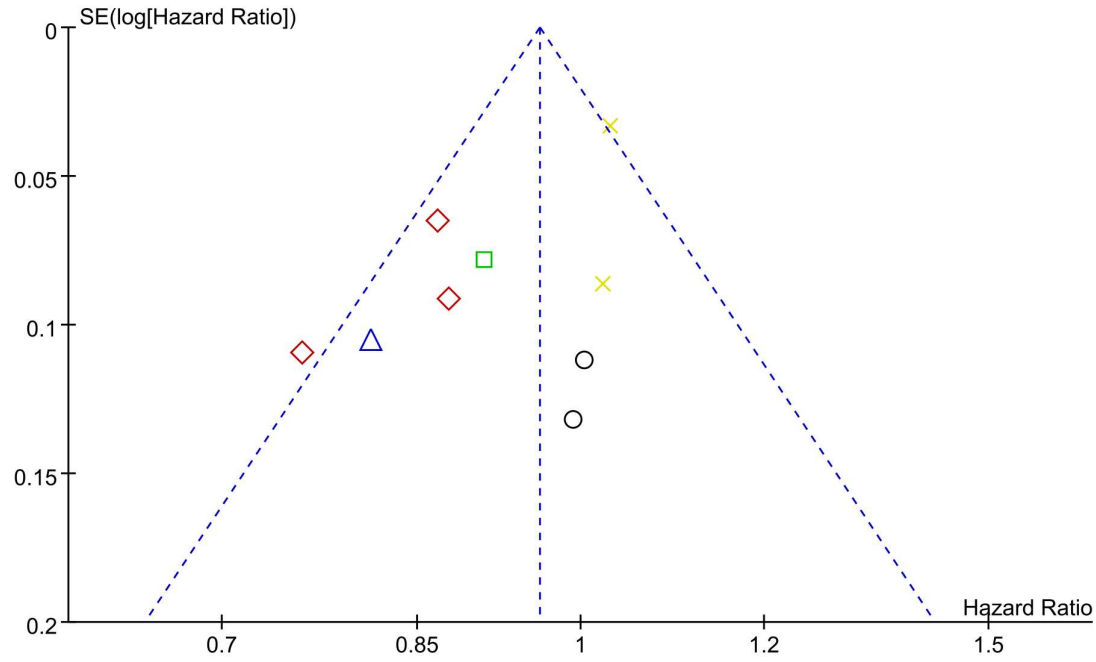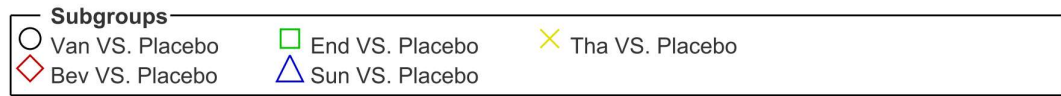**B**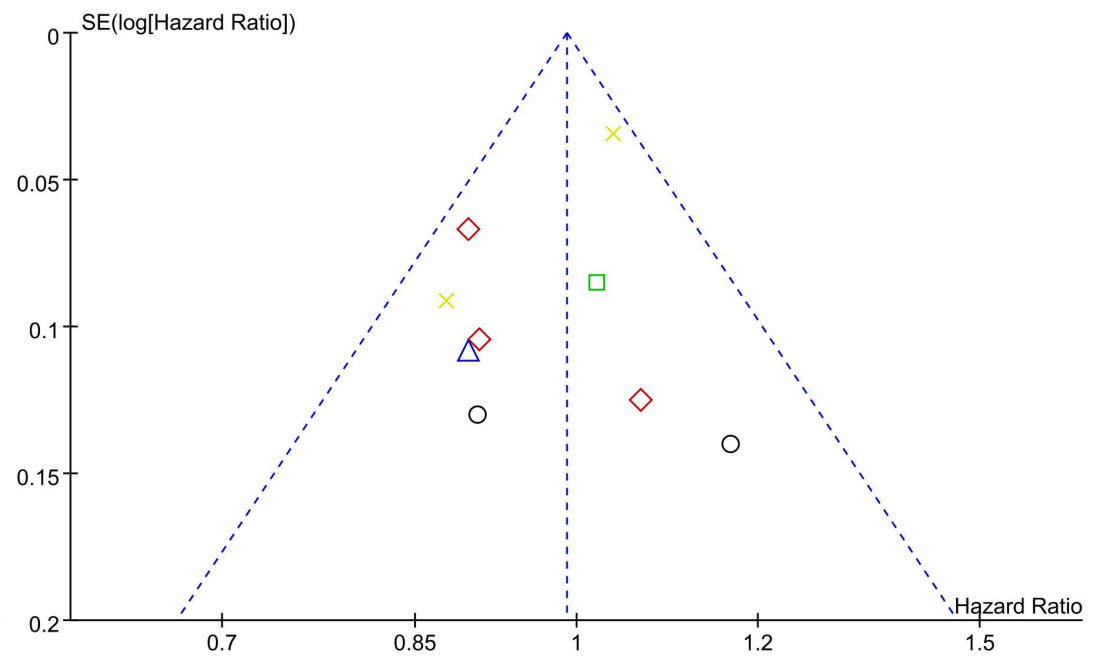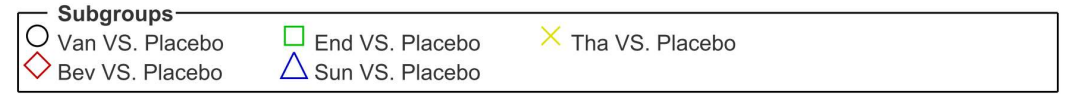

Supplement: CAM4-8-5930-s002.pdf [file CAM4-8-5930-s002.pdf]
